# Supplementary material
Source: MDPI journal article supplement (https://www.mdpi.com/2071-1050/9/11/2068)
Supplement: s1 [file s1]

## Sheet: Index
	Paper data: The concept of caloric unequal exchange and its relevance for food system analysis: the Ecuador case study
	INDEX
	Figure 1. Ecuador trade balance, 106 2007 US$, 1965-2012
	Table 1. Food trade balance for Ecuador with the rest of the world, volume, value, and calories, 1988-2013
	Figure 2. Ecuador exports, imports and balance of food products (1012 kcal), 1988-2013
	Table 2. Food consumption by product group for Ecuador, measured in kcal, 1961-2011
	Table 3. Evolution of exports and imports measured in kcal by product group, 1988-2013
	Figure 3. Ecuador exports, imports and trade balance for food products with Europe (1012 kcal), 1988-2013
	Figure 4. Ecuador exports, imports and trade balance for food products with CAN (1012 kcal), 1988-2013
	Figure 5. Ecuador exports, imports and trade balance for food products with the USA (1012 kcal), 1988-2013
	Figure 6. Ecuador exports, imports and terms of trade for food products, 1988-2013
	Figure 7. Ecuador exports, imports and terms of trade with Europe for food products, 1988-2013
	Figure 8. Ecuador exports, imports, and terms of trade with CAN for food products, 1988-2013
	Figure 9. Ecuador exports, imports and terms of trade with the USA for food products, 1988-2013
	Table 4. Share of accumulated calorie intake in total consumption, per product, 1961-2011

## Sheet: Figure 1
Ecuador trade balance, 10⁶ 2007 US$, 1965-2012 (FOB price)
Year	Exports	Imports	Balance	GDP	(X+M)/GDP
1965	888.024	1663.21	-775.187	10315.3	0.247326		Figure 1. Ecuador trade balance, 10⁶ 2007 US$, 1965-2012
1966	921.607	1717.05	-795.442	10280.3	0.256672
1967	988.751	2069.82	-1081.07	10755.3	0.284378
1968	1015	2328.03	-1313.03	10960.7	0.305002
1969	891.178	2328.57	-1437.39	11472.5	0.28065
1970	892.85	2403.43	-1510.58	12260.8	0.268846
1971	986.82	2893.43	-1906.61	13032.4	0.29774
1972	1793.54	2727.82	-934.287	13686.3	0.330357
1973	3777.76	3226.11	551.646	15595.6	0.449093
1974	4636.25	4740.18	-103.924	17343.6	0.540626
1975	3742.92	5001.37	-1258.45	19246.6	0.454329
1976	3841.42	5100.82	-1259.41	20670.3	0.432613
1977	3898.14	5983.52	-2085.38	21002	0.470509
1978	4150.23	6209.43	-2059.21	22200.6	0.466639
1979	4270.69	6355.06	-2084.37	23029.6	0.461395
1980	4286.85	6954.59	-2667.74	23883.7	0.470675
1981	4322.99	6737.47	-2414.48	25224.2	0.438485
1982	4111.27	6926.4	-2815.14	25379.3	0.434908		Source: (BCE, 2016).
1983	4041.53	5380.35	-1338.82	25293.8	0.372497		Source: Central Bank of Ecuador (2016)
1984	4152.3	5186.93	-1034.63	25957.9	0.359784
1985	4462.79	5628.6	-1165.82	26979.3	0.374042
1986	4981.23	5600.22	-618.982	27914.1	0.379072
1987	4476.25	6606.44	-2130.19	27841.7	0.39806
1988	6151.24	5470.57	680.665	29481.8	0.394204
1989	6233.25	5720.26	512.99	29778.3	0.401417
1990	6272.49	5631.3	641.198	30874.1	0.385559
1991	7318.43	6295.14	1023.29	32199	0.422795
1992	7722.13	6577.53	1144.61	32879.8	0.434907
1993	8201.13	6541.31	1659.83	33528.6	0.439698
1994	9258.4	7586.38	1672.02	34956.3	0.481881
1995	10217.5	8438.34	1779.12	35743.7	0.521932
1996	10000.6	7375.37	2625.22	36362.7	0.477851
1997	10699.2	8888.27	1810.95	37936.4	0.516324
1998	10192.4	9468.83	723.611	39175.6	0.501875
1999	10970.2	6477.11	4493.1	37319	0.467519
2000	11248.4	7307.58	3940.85	37726.4	0.491857
2001	11069.9	9187.27	1882.63	39241.4	0.51622
2002	11139	10934.2	204.726	40849	0.54036
2003	11942.1	10490.3	1451.76	41961.3	0.534598
2004	13993.5	11631.4	2362.19	45406.7	0.564342
2005	15201.6	13305.7	1895.89	47809.3	0.596272
2006	16284.9	14606.2	1678.72	49914.6	0.618878
2007	16287.7	15636.6	651.062	51007.8	0.625871
2008	16773.7	17894.4	-1120.73	54250.4	0.639039
2009	15970.5	16119.4	-148.91	54557.7	0.588183
2010	15932.7	18509	-2576.33	56481.1	0.609791
2011	16663.7	19225.2	-2561.45	60882.6	0.589477
2012	17107.9	19584.9	-2477.01	64009.5	0.573241
Source: Central Bank of Ecuador (2016)

## Sheet: Table 1
Table 1. Food trade balance for Ecuador with the rest of the world, volume, value, and calories, 1988-2013
Year	Exports (10³ Tn)	Imports (10³ Tn)	Exports (10⁶ US$ 2005)*	Imports (10⁶ US$ 2005)*	Exports (10¹² kcal)	Imports (10¹² kcal)
1988	1526.46	637.487	282.292	57.6896	1.28272	2.24891
1994	3492.49	547.14	610.907	81.5679	2.78726	1.89713
2000	4610.53	808.006	1259.01	237.15	3.72386	3.05557
2005	5638.38	1367.41	1722.3	510.372	5.17206	4.7373
2009	6649.84	1504.51	2253.69	550.548	6.4328	5.06379
2013	6508.18	1358.42	2219.61	629.458	6.84787	4.73318
Δ 1988-2013	4.26358	2.1309	7.86283	10.9111	5.33854	2.10465
* Adjusted to the value added deflator by country for Agriculture, silviculture and fishing (value US$, 2005 prices)
¹ Data is obtained from trade matrix
Source: (FAO, 2016)

## Sheet: Figure 2
Ecuador exports, imports and balance for food products (10¹² kcal), 1988-2013
Años	Exports	Imports	Balance	Banana exports	% banana exports/total exports
1988	1.28272	2.24891	-0.966189	0.7984	62.2426	Figure 2. Ecuador exports, imports and balance for food products (10¹² kcal), 1988-2013
1989	1.47181	2.03552	-0.563717	0.9348	63.5137
1990	1.81627	1.88312	-0.066853	1.2167	66.989
1991	2.22071	2.4135	-0.192785	1.6301	73.4044
1992	2.138	1.21585	0.922156	1.6439	76.8896
1994	2.78726	1.89713	0.890131	1.8739	67.2308
1995	3.22719	2.00574	1.22145	2.2392	69.3855
1996	4.01191	2.22066	1.79124	2.3196	57.8179
1997	4.29345	3.28082	1.01263	2.6773	62.3578
1998	3.10201	5.05553	-1.95352	2.3317	75.1674
1999	4.26454	3.31928	0.945263	2.361	55.3635
2000	3.72386	3.05557	0.668292	2.3964	64.3525
2001	3.83295	3.3307	0.502255	2.1202	55.3151
2002	4.17338	4.09914	0.074242	2.5195	60.3708
2003	4.84062	3.92225	0.918367	2.7989	57.8211
2004	4.54634	4.71731	-0.17097	2.8193	62.0125
2005	5.17206	4.7373	0.434758	2.8585	55.2682
2006	5.83003	5.53033	0.299694	2.9451	50.5161	Source: (FAO, 2016)
2007	6.03311	5.53698	0.496127	3.1047	51.461
2008	5.87676	5.05733	0.819436	3.1624	53.8119
2009	6.4328	5.06379	1.36901	3.4204	53.1712
2010	5.62999	6.32371	-0.693728	3.0939	54.954
2011	7.23255	6.45112	0.781437	3.4668	47.9333
2012	6.88086	5.55216	1.32869	3.1099	45.1964
2013	6.84787	4.73318	2.11469	3.2112	46.8934
Source: (FAO, 2016)

## Sheet: Table 2
Table 2. Food consumption by product group for Ecuador, measured in kcal, 1961-2011
Product group	10¹² kcal/year						% kcal by products group						Consumption kcal/person/day
	Year 1961	Year 1971	Year 1981	Year 1991	Year 2001	Year 2011	Year 1961	Year 1971	Year 1981	Year 1991	Year 2001	Year 2011	Year 1961	Year 1971	Year 1981	Year 1991	Year 2001	Year 2011
Cereals - Excluding Beer	0.997359	1.36176	1.90203	2.80599	3.69124	4.38658	35.0931	33.754	33.3969	41.5817	46.796	45.1726	588.265	601.846	642.307	741.98	791.251	788.273
Fruits - Excluding Wine	0.569594	0.724495	1.03915	0.839359	1.17119	1.29077	20.0418	17.9581	18.2461	12.4384	14.8478	13.2922	335.959	320.2	350.918	221.949	251.055	231.953
Sugar & Sweeteners	0.431419	0.757998	1.15654	1.01725	0.831871	1.03071	15.1799	18.7886	20.3072	15.0745	10.5461	10.6142	254.461	335.007	390.559	268.987	178.319	185.22
Starchy Roots	0.283361	0.472812	0.322691	0.260885	0.302763	0.249768	9.97036	11.7196	5.666	3.86603	3.8383	2.57209	167.133	208.965	108.971	68.985	64.9001	44.8836
Vegetable Oils	0.238649	0.361846	0.871536	1.44067	1.52139	2.16926	8.39712	8.9691	15.3029	21.3492	19.2876	22.3388	140.761	159.922	294.314	380.953	326.125	389.818
Pulses	0.17393	0.185565	0.137364	0.123299	0.133951	0.134837	6.11991	4.59961	2.41192	1.82715	1.69818	1.38854	102.588	82.0128	46.3872	32.6036	28.7136	24.2304
Vegetables	0.066126	0.067939	0.062291	0.075691	0.074787	0.116819	2.32671	1.68401	1.09374	1.12166	0.948119	1.20299	39.0026	30.0265	21.0354	20.0147	16.0313	20.9925
Oilcrops	0.047985	0.049125	0.052887	0.028218	0.032137	0.080404	1.6884	1.21766	0.928621	0.418159	0.40742	0.827993	28.3026	21.7114	17.8597	7.4616	6.88886	14.4487
Alcoholic Beverages	0.02883	0.048464	0.129977	0.127579	0.094416	0.18819	1.01441	1.20128	2.28221	1.89058	1.19697	1.93796	17.0046	21.4193	43.8927	33.7353	20.2389	33.818
Other*	0.004781	0.004359	0.020754	0.029199	0.034194	0.063378	0.168225	0.108047	0.364411	0.432697	0.433497	0.652661	2.81994	1.92651	7.00854	7.721	7.3298	11.3891
* Include: Stimulants, treenuts, sugar crops, spices and miscellaneous
Source: (FAO, 2016)

## Sheet: Table 3
Table 3. Evolution of exports and imports measured in kcal by product group, 1988-2013
Product group	1988		1994		2000		2005		2009		2013
	% X	% M	% X	% M	% X	% M	% X	% M	% X	% M	% X	% M
Fruits - Excluding Wine	62.4903	0.0444642	67.719	0.716884	67.8652	0.553083	58.2027	0.871823	55.2675	1.11973	50.7499	1.67751
Stimulants	26.0876	0	13.0301	0.363713	7.96992	0.157089	7.6816	0.593177	9.15295	0.446314	12.2187	0.669737
Sugar & Sweeteners	6.3153	8.35038	2.44672	15.6766	3.21966	3.24977	4.77756	4.66942	1.31356	3.10445	0.474612	3.13107
Vegetable Oils	3.41494	6.74522	6.04865	14.0003	7.21805	22.8335	21.5618	17.6328	30.4964	22.7008	31.7128	28.5874
Cereals - Excluding Beer	1.60611	84.1707	10.0057	63.7657	9.39581	69.3284	4.60741	71.5254	1.93847	68.3749	2.55122	61.4574
Vegetables	0.04678	0.0266785	0.129153	0.0790681	0.408163	0.307632	0.512364	0.386304	0.362201	0.943974	0.617726	0.773261
Alcoholic Beverages	0.02339	0.640285	0.050226	1.7764	0.0134264	0.255269	0.0638039	0.791607	0.0202086	0.560855	0.0233655	0.323249
Pulses	0.00779666	0	0.075339	2.15592	0.644468	2.89959	1.0518	2.74846	0.289139	1.76353	0.438103	1.95217
Spices	0.00779666	0	0.0107627	0.200306	0.0107411	0.117816	0.0135342	0.143545	0.0264267	0.134289	0.0219052	0.169019
Starchy Roots	0	0	0.0932769	0.0316272	0.671321	0.0425448	0.763713	0.118213	0.48967	0.209333	0.186924	0.234514
Other*	0	0.0222321	0.391045	1.23346	2.58324	0.255269	0.763713	0.519294	0.643567	0.641823	1.00472	1.02468
* Include: Treenuts, oilcrops and miscellaneous
X: exports
M: Imports
Source: (FAO, 2016)

## Sheet: Figure 3
Ecuador exports, imports and balance for food products with the Europe (10¹² kcal), 1988-2013
Year	Exports	Imports	Balance
1988	0.150188	0.0136039	0.136584		Figure 3. Ecuador exports, imports and trade balance for food products with Europe (1012 kcal), 1988-2013
1989	0.124196	0.0105192	0.113677
1990	0.223645	0.143978	0.0796669
1991	0.49952	0.0366594	0.46286
1992	0.641426	0.0055982	0.635827
1994	0.887699	0.316424	0.571276
1995	1.08086	0.0383141	1.04255
1996	1.07258	0.0513055	1.02127
1997	1.25364	0.024307	1.22933
1998	0.893607	0.0225036	0.871104
1999	1.27906	0.013079	1.26598
2000	1.39234	0.0122528	1.38009
2001	1.28397	0.022793	1.26118
2002	1.72198	0.0388617	1.68312
2003	2.0138	0.0568424	1.95696
2004	2.01149	0.0453322	1.96615
2005	2.23768	0.0414658	2.19622
2006	2.18917	0.239679	1.94949		Source: (FAO, 2016).
2007	2.65954	0.0517567	2.60779
2008	2.79278	0.144589	2.64819
2009	2.80415	0.205072	2.59908
2010	2.38053	0.0421698	2.33836
2011	3.17309	0.0732567	3.09983
2012	2.70283	0.122603	2.58023
2013	2.61111	0.153432	2.45768
Source: (FAO, 2016).

## Sheet: Figure 4
Ecuador exports, imports and balance for food products with CAN¹ (10¹² kcal), 1988-2013
Year	Exports	Imports	Balance
1988	0.0263349	0.0017215	0.0246134		Figure 4. Ecuador exports, imports and trade balance for food products with CAN (1012 kcal), 1988-2013
1989	0.0144476	0.0003335	0.0141141
1990	0.035799	0.022793	0.013006
1991	0.0349297	0.0123526	0.0225771
1992	0.0235031	0.0849374	-0.0614343
1994	0.403853	0.283912	0.11994
1995	0.297058	0.307365	-0.010307
1996	0.727658	0.108623	0.619034
1997	0.986286	0.30015	0.686137
1998	0.418707	0.756032	-0.337325
1999	0.762847	0.182674	0.580173
2000	0.757472	0.335546	0.421926
2001	1.15961	0.291578	0.868031
2002	0.946833	0.553644	0.393188
2003	1.01182	0.317602	0.69422
2004	0.701719	0.347368	0.354351
2005	0.760702	0.408705	0.351998
2006	1.14684	0.335313	0.811531		Source: (FAO, 2016).
2007	0.821133	0.449547	0.371586		¹ The trade partner countries of Ecuador (CAN members) were considered: Colombia, Bolivia and Peru.
2008	0.691332	0.573902	0.11743
2009	1.06855	0.731269	0.337286
2010	0.706536	0.877572	-0.171036
2011	0.910096	1.29114	-0.381045
2012	1.03979	1.29432	-0.254532
2013	1.11594	1.5466	-0.43066
Source: (FAO, 2016).

## Sheet: Figure 5
Ecuador exports, imports and balance for food products with USA (10¹² kcal), 1988-2011
Year	Exports	Imports	Balance
1988	0.845825	1.89712	-1.05129		Figure 5. Ecuador exports, imports and trade balance for food products with the USA (1012 kcal), 1988-2013
1989	0.896687	1.6776	-0.78091
1990	1.18975	1.55395	-0.364198
1991	1.11921	1.53596	-0.416754
1992	0.864235	0.130035	0.7342
1994	0.762788	0.146203	0.616586
1995	0.855948	0.916165	-0.0602172
1996	1.02072	0.933904	0.0868132
1997	0.864806	1.44909	-0.58428
1998	0.924186	1.52466	-0.60047
1999	1.01294	1.4452	-0.43226
2000	0.726035	1.12467	-0.39863
2001	0.845148	1.0954	-0.25025
2002	0.82471	1.63595	-0.811236
2003	0.880702	1.2778	-0.397093
2004	0.855792	2.01349	-1.1577
2005	0.964581	1.44663	-0.482053
2006	1.05854	1.80268	-0.744141		Source: (FAO, 2016)
2007	0.894766	2.33988	-1.44511
2008	0.937052	1.41669	-0.479635
2009	1.1864	1.50142	-0.315019
2010	0.968846	0.937908	0.0309379
2011	1.17168	1.23431	-0.062623
2012	0.96741	0.680026	0.287385
2013	1.01639	0.606785	0.409604
Source: (FAO, 2016)

## Sheet: Figure 6
Ecuador exports, imports and terms of trade, 1988-2013
(millones de US$ 2005)				US$/millón de kcal		US$ 2005 X kcal/US$ 2005 M kcal
Year	Exports	Imports	Saldo	Exports	Imports
1988	282.292	57.6896	224.602	220.072	25.6522	8.57907	Figure 6. Ecuador exports, imports and terms of trade for food products, 1988-2013
1989	321.667	78.7229	242.944	218.552	38.6745	5.65107
1990	366.182	75.6465	290.536	201.613	40.1708	5.01888
1991	485.394	72.632	412.762	218.576	30.0941	7.26307
1992	460.927	48.5878	412.339	215.588	39.9621	5.3948
1994	610.907	81.5679	529.339	219.178	42.9954	5.09771
1995	600.207	111.381	488.825	185.984	55.5312	3.34919
1996	725.118	127.459	597.659	180.742	57.3969	3.14898
1997	849.884	145.223	704.661	197.949	44.2644	4.47198
1998	745.585	257.518	488.066	240.356	50.9379	4.7186
1999	1322.88	194.215	1128.66	310.204	58.5114	5.3016
2000	1259.01	237.15	1021.86	338.093	77.6123	4.35617
2001	1314.04	301.79	1012.25	342.828	90.6088	3.78361
2002	1438.48	393.672	1044.8	344.679	96.0377	3.589
2003	1668.83	400.465	1268.37	344.756	102.101	3.37663
2004	1638.65	487.966	1150.68	360.433	103.441	3.48441
2005	1722.3	510.372	1211.93	333.002	107.735	3.09094	Source: (FAO, 2016)
2006	1902.16	552.426	1349.74	326.27	99.8902	3.26629
2007	2010.32	665.505	1344.82	333.215	120.193	2.77234
2008	2111.34	796.86	1314.48	359.27	157.566	2.28013
2009	2253.69	550.548	1703.15	350.344	108.722	3.22237
2010	2148.23	649.099	1499.13	381.569	102.645	3.71736
2011	2464.26	740.237	1724.03	340.718	114.746	2.96934
2012	2183.12	669.617	1513.5	317.275	120.605	2.6307
2013	2219.61	629.458	1590.15	324.132	132.988	2.43729
Source: (FAO, 2016)
							Source: (FAO, 2016)

[truncated: 4 more sheets: Figure 7, Figure 8, Figure 9, Table 4]
